# Supplementary material for: Neural correlates of long-term intense romantic love
Source: Oxford University Press journal article supplement (doi:10.1093/scan/nsq092), 2011-01-05
Supplement: nsq092_supplementary_data.zip [file nsq092_supplementary_data.zip]

Archive with 1 entries (1 files):
- scan-10-027.pdf
