# Supplementary material for: Neural correlates of long-term intense romantic love
Source: Oxford University Press journal article supplement (doi:10.1093/scan/nsq092), 2011-01-05
Supplement: nsq092_supplementary_data.zip [file nsq092_supplementary_data.zip › scan-10-027.pdf]

**Supplementary Table 1***Means and Standard Deviations Describing Target Stimuli in Relation to Study Participants*

|                             | Age           | Years Known                | Closeness                  | Attractiveness | Image Quality |
|-----------------------------|---------------|----------------------------|----------------------------|----------------|---------------|
| Partner                     | 54.82 (7.98)  | 24.18 (6.42)               | 5.82 (1.59)                | 5.04 (1.14)    | 6.51 (1.67)   |
| Close Friend                | 54.06 (13.05) | 25.59 (14.31)              | 3.06 (1.60) <sup>a</sup>   | 4.47 (1.25)    | 5.63 (1.76)   |
| Highly-familiar,<br>neutral | 55.25 (10.96) | 19.97 (8.66)               | 1.53 (0.62) <sup>a,b</sup> | 4.65 (1.31)    | 6.22 (2.00)   |
| Low-familiar,<br>neutral    | 48.63 (13.23) | 0.83 (0.78) <sup>a,b</sup> | 1.12 (0.33) <sup>a,b</sup> | 4.53 (1.32)    | 5.41 (1.71)   |

Note: Closeness (Inclusion of Other in the Self Scale) measured on a 7-point scale with 1 = lowest closeness and 7 = highest closeness. Attractiveness and Image Quality were coder-rated on a 10-point scale, with 1 indicating the lowest degree and 10 indicating the highest degree.

Standard deviations are in parentheses.

(a) indicates significantly different from the Partner at  $p < .01$ .

(b) indicates significantly different from the Close Friend at  $p < .01$ .

**Supplementary Table 2**

*Significant Regional Activations and Deactivations Showing Unpredicted Responses to Images of the Partner versus Images of the Highly-Familiar, Neutral Acquaintance*

| Brain region                  | Left |     |     |     |  | Right |     |     |     |
|-------------------------------|------|-----|-----|-----|--|-------|-----|-----|-----|
|                               | x    | y   | Z   | P   |  | x     | y   | z   | P   |
| <b><i>Exploratory</i></b>     |      |     |     |     |  |       |     |     |     |
| Superior colliculus           |      |     |     |     |  | 0     | -32 | -6  | .00 |
| Caudate nucleus               | -16  | -14 | 20  | .00 |  |       |     |     |     |
| Thalamus                      | -2   | -14 | 12  | .01 |  | 2     | -16 | 14  | .00 |
| Hippocampus                   | -18  | -24 | -14 | .00 |  |       |     |     |     |
| Posterior cingulate/precuneus | -26  | -62 | 12  | .00 |  |       |     |     |     |
| Parahippocampal gyrus         | -22  | -8  | -32 | .00 |  |       |     |     |     |
| Posterior orbital gyrus       | -26  | 32  | -16 | .00 |  |       |     |     |     |
| Lateral occipital lobe        | -52  | -60 | -6  | .00 |  |       |     |     |     |
| Superior parietal gyrus       | -8   | -54 | 68  | .00 |  |       |     |     |     |
| Inferior temporal gyrus       | -46  | -16 | -24 | .00 |  |       |     |     |     |
| <b><i>Deactivations</i></b>   |      |     |     |     |  |       |     |     |     |
| Supramarginal gyrus           |      |     |     |     |  | 56    | -66 | 32  | .00 |
| Inferior frontal gyrus        | -60  | 12  | 20  | .00 |  | 44    | 52  | 4   | .00 |
| Superior frontal gyrus        |      |     |     |     |  | 20    | 66  | 10  | .00 |
| Middle temporal gyrus         | -54  | 4   | -22 | .00 |  | 64    | -46 | -12 | .00 |
| Superior temporal gyrus       | -46  | -6  | -8  | .00 |  |       |     |     |     |
| Lingual gyrus                 | -14  | -62 | -6  | .00 |  |       |     |     |     |

|                            |    |     |    |     |  |  |  |  |  |
|----------------------------|----|-----|----|-----|--|--|--|--|--|
| Occipital/parietal fissure | -6 | -82 | 42 | .00 |  |  |  |  |  |
|----------------------------|----|-----|----|-----|--|--|--|--|--|

**Note.** Regions of interest were identified as the highest intensity voxel in a cluster for the Partner versus highly-familiar neutral acquaintance (HFN) contrast. MNI coordinates (x,y,z) are at the maximum value for the cluster, which may be elongated in any direction. Results are for exploratory, whole-brain analysis; P values (P) are for uncorrected multiple comparisons with a spatial extent of  $\geq 15$  contiguous voxels.
